# Supplementary material
Source: PubMed Central journal article supplement (PMC4822522)

**Supplementary Figure 1. Least squares means of serum lipid and lipoprotein levels by menopausal status and use of hormone replacement therapy.** Least squares means of lipids are adjusted for study group (low-fat dietary intervention or control), parity at baseline (parous; nonparous), if smoked ever at baseline (yes; no), if had first degree relatives with breast cancer at baseline (yes; no), study site (Toronto; London; Hamilton; Windsor; Vancouver; Surrey), age at menarche (years), age at birth of first child (years), number of live births, average weight (kg), average age (years), date of randomization, and case-control status. *P* is the p-value for the significance of the overall effect of menopausal status and hormone replacement therapy (HRT) use. Different letters show pairwise comparisons that are significant at the 5% level; the pairwise comparisons significant at the 10% level are marked with an asterisk.

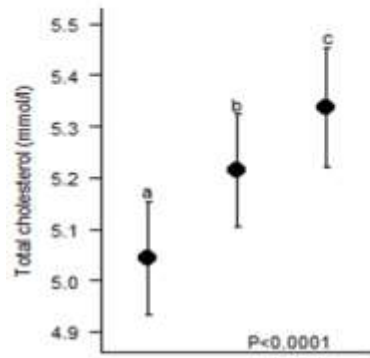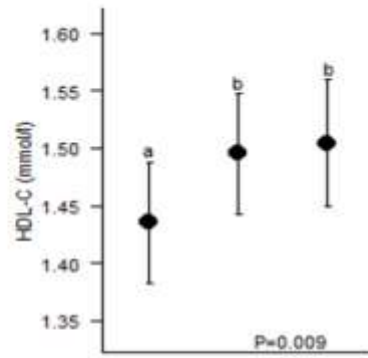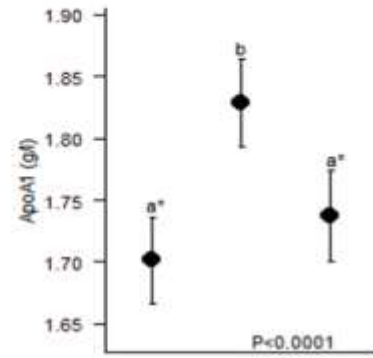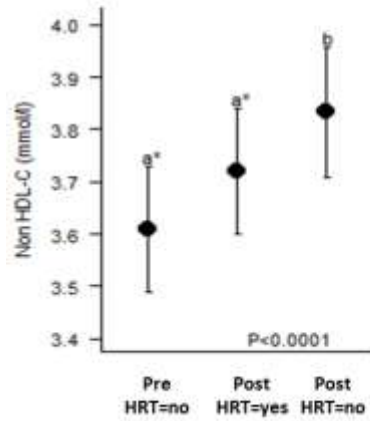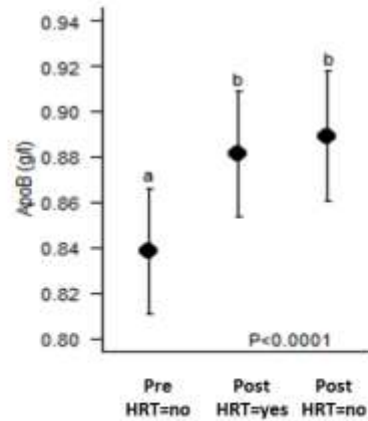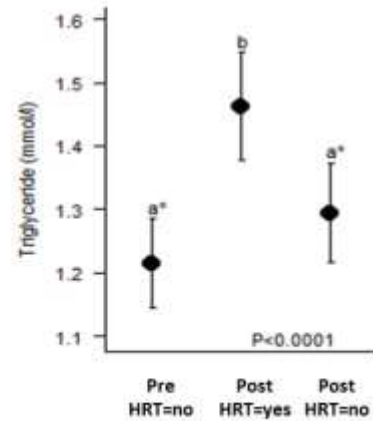

Supplement: supp_djv032_jnci_JNCI_14_0919_s01.pdf [file supp_djv032_jnci_JNCI_14_0919_s01.pdf]
